# Supplementary material for: Ba3SnGa10−xInxO20 (0 ≤ x ≤ 2): site-selective doping, band structure engineering and photocatalytic overall water splitting
Source: Royal Society of Chemistry journal article supplement (doi:10.1039/d4dt00340c), 2024-01-01
Supplement: d4dt00340c1.pdf [file d4dt00340c1.pdf]

Supporting information for

$\text{Ba}_3\text{SnGa}_{10-x}\text{In}_x\text{O}_{20}$  ( $0 \leq x \leq 2$ ): Site-selective doping, band structure  
engineering and photocatalytic overall water splitting

Weihua Li, Guangxiang Lu, Yanhong Ding, Rihong Cong,\* Tao Yang\*

College of Chemistry and Chemical Engineering, Chongqing University, Chongqing 401331,

People's Republic of China

\*Corresponding authors: [congrihong@cqu.edu.cn](mailto:congrihong@cqu.edu.cn); [taoyang@cqu.edu.cn](mailto:taoyang@cqu.edu.cn).

Table S1. Atomic coordinate, occupancy factor, isotropic thermal displacement factors for Ba<sub>3</sub>SnGa<sub>10</sub>O<sub>20</sub> obtained from Rietveld refinements

| atom | site | <i>x</i>   | <i>y</i>   | <i>z</i>  | Occ.     | B <sub>eq</sub> |
|------|------|------------|------------|-----------|----------|-----------------|
| Ba1  | 2a   | 0          | 0          | 0         | 1        | 1.20(2)         |
| Ba2  | 4i   | 0.28026(3) | 0          | 0.0212(1) | 1        | 1.00(2)         |
| Ga1  | 2b   | 0          | 0.5        | 0         | 0.770(4) | 0.75(4)         |
| Sn1  | 2b   | 0          | 0.5        | 0         | 0.230(4) | 0.75(4)         |
| Ga2  | 4h   | 0          | 0.36382(6) | 0.5       | 0.615(2) | 0.58(2)         |
| Sn2  | 4h   | 0          | 0.36382(6) | 0.5       | 0.385(2) | 0.58(2)         |
| Ga3  | 8j   | 0.35398(5) | 0.36346(5) | 0.0113(1) | 1        | 0.72(2)         |
| Ga4  | 8j   | 0.13874(5) | 0.28522(5) | 0.9758(1) | 1        | 0.56(2)         |
| O1   | 4i   | 0.4357(3)  | 0          | 0.8179(8) | 1        | 0.53(3)         |
| O2   | 4i   | 0.9018(3)  | 0          | 0.4157(8) | 1        | 0.53(3)         |
| O3   | 8j   | 0.2384(2)  | 0.3645(3)  | 0.8988(6) | 1        | 0.53(3)         |
| O4   | 8j   | 0.4143(2)  | 0.2501(2)  | 0.8400(6) | 1        | 0.53(3)         |
| O5   | 8j   | 0.8610(2)  | 0.1446(2)  | 0.8640(6) | 1        | 0.53(3)         |
| O6   | 8j   | 0.0739(2)  | 0.3797(3)  | 0.1801(6) | 1        | 0.53(3)         |

$a = 15.19472(3) \text{ \AA}$ ,  $b = 11.76213(3) \text{ \AA}$ ,  $c = 5.15730(1) \text{ \AA}$ ,  $\beta = 90.9765(1) \text{ \AA}$ ,  $V = 921.591(3) \text{ \AA}^3$

$R_p = 3.211\%$ ,  $R_{wp} = 4.221\%$ ,  $R_{exp} = 2.156\%$ ,  $GOF = 1.958$ .

Definition of R factors and GOF:

$$R_p = \frac{\sum |Y_{o,m} - Y_{c,m}|}{\sum Y_{o,m}} \quad R_{wp} = \left[ \frac{\sum w_m (Y_{o,m} - Y_{c,m})^2}{\sum w_m Y_{o,m}^2} \right]^{1/2}$$

$$R_{exp} = \left[ \frac{(N-P)}{\sum w_m Y_{o,m}^2} \right]^{1/2} \quad GOF = R_{wp} / R_{exp}$$

Table S2. Selected metal-oxygen bond distances (Å) for Ba<sub>3</sub>SnGa<sub>10-x</sub>In<sub>x</sub>O<sub>20</sub> (0 ≤ x ≤ 2.0) obtained from Rietveld refinements

| <b>Bond</b> | <b>x = 0</b> | <b>x = 0.5</b> | <b>x = 1.0</b> | <b>x = 1.5</b> | <b>x = 2.0</b> |
|-------------|--------------|----------------|----------------|----------------|----------------|
| M1-O1 × 2   | 1.923(4)     | 1.853(6)       | 1.984(5)       | 2.002(6)       | 1.904(8)       |
| M1-O6 × 4   | 2.022(3)     | 2.037(4)       | 2.052(3)       | 2.066(4)       | 2.146(6)       |
| <M1-O>      | 1.989        | 1.976          | 2.029          | 2.045          | 2.065          |
| M2-O1 × 2   | 2.091(3)     | 2.124(4)       | 2.165(3)       | 2.220(4)       | 2.210(5)       |
| M2-O4 × 2   | 2.033(3)     | 2.104(4)       | 2.088(3)       | 2.136(4)       | 2.190(6)       |
| M2-O6 × 2   | 2.020(3)     | 2.037(4)       | 2.113(3)       | 2.153(4)       | 2.147(6)       |
| <M2-O>      | 2.048        | 2.088          | 2.122          | 2.170          | 2.182          |
| Ga3-O2 × 1  | 1.834(2)     | 1.831(3)       | 1.832(2)       | 1.841(3)       | 1.826(4)       |
| Ga3-O3 × 1  | 1.841(3)     | 1.862(4)       | 1.798(3)       | 1.802(4)       | 1.866(6)       |
| Ga3-O4 × 1  | 1.852(3)     | 1.838(4)       | 1.834(3)       | 1.821(4)       | 1.847(6)       |
| Ga3-O5 × 1  | 1.823(3)     | 1.768(4)       | 1.811(3)       | 1.800(4)       | 1.738(6)       |
| <Ga3-O>     | 1.838        | 1.825          | 1.819          | 1.816          | 1.819          |
| Ga4-O3 × 1  | 1.828(3)     | 1.854(4)       | 1.859(3)       | 1.858(4)       | 1.923(6)       |
| Ga4-O4 × 1  | 1.852(3)     | 1.812(4)       | 1.869(3)       | 1.855(4)       | 1.782(6)       |
| Ga4-O5 × 1  | 1.848(3)     | 1.860(4)       | 1.857(3)       | 1.869(4)       | 1.899(6)       |
| Ga4-O6 × 1  | 1.831(3)     | 1.843(4)       | 1.806(3)       | 1.802(4)       | 1.795(6)       |
| <Ga4-O>     | 1.840        | 1.842          | 1.848          | 1.846          | 1.850          |

Table S3. Atomic coordinate, occupancy factor, isotropic thermal displacement factors for  $\text{Ba}_3\text{SnGa}_9.5\text{In}_{0.5}\text{O}_{20}$  obtained from Rietveld refinements

| atom    | site | $x$        | $y$        | $z$       | Occ.     | $B_{\text{eq}}$ |
|---------|------|------------|------------|-----------|----------|-----------------|
| Ba1     | 2a   | 0          | 0          | 0         | 1        | 1.49(3)         |
| Ba2     | 4i   | 0.27982(5) | 0          | 0.0188(1) | 1        | 1.19(2)         |
| Ga1     | 2b   | 0          | 0.5        | 0         | 0.656(5) | 0.98(5)         |
| Sn1/In1 | 2b   | 0          | 0.5        | 0         | 0.344(5) | 0.98(5)         |
| Ga2     | 4h   | 0          | 0.36130(7) | 0.5       | 0.422(2) | 0.81(3)         |
| Sn2/In2 | 4h   | 0          | 0.36130(7) | 0.5       | 0.578(2) | 0.81(3)         |
| Ga3     | 8j   | 0.35296(7) | 0.36508(7) | 0.0096(2) | 1        | 0.95(3)         |
| Ga4     | 8j   | 0.13967(7) | 0.28434(7) | 0.9744(2) | 1        | 0.54(3)         |
| O1      | 4i   | 0.4396(4)  | 0          | 0.807(1)  | 1        | 0.50(5)         |
| O2      | 4i   | 0.9010(4)  | 0          | 0.411(1)  | 1        | 0.50(5)         |
| O3      | 8j   | 0.2377(3)  | 0.3676(4)  | 0.8866(8) | 1        | 0.50(5)         |
| O4      | 8j   | 0.4105(3)  | 0.2536(3)  | 0.8323(8) | 1        | 0.50(5)         |
| O5      | 8j   | 0.8587(3)  | 0.1473(3)  | 0.8491(7) | 1        | 0.50(5)         |
| O6      | 8j   | 0.0734(3)  | 0.3781(4)  | 0.1779(8) | 1        | 0.50(5)         |

$a = 15.26409(4) \text{ \AA}$ ,  $b = 11.81621(3) \text{ \AA}$ ,  $c = 5.18857(1) \text{ \AA}$ ,  $\beta = 90.9007(2) \text{ \AA}$ ,  $V = 935.715(5) \text{ \AA}^3$

$R_p = 4.184\%$ ,  $R_{\text{wp}} = 5.492\%$ ,  $R_{\text{exp}} = 2.498\%$ ,  $\text{GOF} = 2.199$ .

Table S4. Atomic coordinate, occupancy factor, isotropic thermal displacement factors for  $\text{Ba}_3\text{SnGa}_9\text{InO}_{20}$  obtained from Rietveld refinements

| atom | site | $x$        | $y$        | $z$       | Occ.     | $B_{\text{eq}}$ |
|------|------|------------|------------|-----------|----------|-----------------|
| Ba1  | 2a   | 0          | 0          | 0         | 1        | 1.22(2)         |
| Ba2  | 4i   | 0.27980(4) | 0          | 0.0175(1) | 1        | 0.97(2)         |
| Ga1  | 2b   | 0          | 0.5        | 0         | 0.535(4) | 0.46(4)         |
| Sn1  | 2b   | 0          | 0.5        | 0         | 0.465(4) | 0.46(4)         |
| Ga2  | 4h   | 0          | 0.35937(5) | 0.5       | 0.233(2) | 0.70(2)         |
| Sn2  | 4h   | 0          | 0.35937(5) | 0.5       | 0.767(2) | 0.70(2)         |
| Ga3  | 8j   | 0.35242(5) | 0.36477(5) | 0.0093(2) | 1        | 0.56(2)         |
| Ga4  | 8j   | 0.14077(5) | 0.28291(5) | 0.9768(2) | 1        | 0.48(2)         |
| O1   | 4i   | 0.4324(3)  | 0          | 0.8218(9) | 1        | 0.45(4)         |
| O2   | 4i   | 0.9008(3)  | 0          | 0.4175(9) | 1        | 0.45(4)         |
| O3   | 8j   | 0.2406(2)  | 0.3645(3)  | 0.8997(6) | 1        | 0.45(4)         |
| O4   | 8j   | 0.4125(2)  | 0.2557(3)  | 0.8357(6) | 1        | 0.45(4)         |
| O5   | 8j   | 0.8582(2)  | 0.1447(3)  | 0.8557(6) | 1        | 0.45(4)         |
| O6   | 8j   | 0.0763(2)  | 0.3776(3)  | 0.1681(7) | 1        | 0.45(4)         |

$a = 15.32033(4) \text{ \AA}$ ,  $b = 11.85491(3) \text{ \AA}$ ,  $c = 5.21515(1) \text{ \AA}$ ,  $\beta = 90.8105(2) \text{ \AA}$ ,  $V = 947.086(4) \text{ \AA}^3$

$R_p = 3.140\%$ ,  $R_{\text{wp}} = 4.092\%$ ,  $R_{\text{exp}} = 2.220\%$ ,  $\text{GOF} = 1.844$ .

Table S5. Atomic coordinate, occupancy factor, isotropic thermal displacement factors for  $\text{Ba}_3\text{SnGa}_{8.5}\text{In}_{1.5}\text{O}_{20}$  obtained from Rietveld refinements

| atom | site | $x$        | $y$        | $z$       | Occ.     | $B_{\text{eq}}$ |
|------|------|------------|------------|-----------|----------|-----------------|
| Ba1  | 2a   | 0          | 0          | 0         | 1        | 1.19(3)         |
| Ba2  | 4i   | 0.27946(5) | 0          | 0.0154(1) | 1        | 0.85(2)         |
| Ga1  | 2b   | 0          | 0.5        | 0         | 0.330(4) | 0.36(4)         |
| Sn1  | 2b   | 0          | 0.5        | 0         | 0.670(4) | 0.36(4)         |
| Ga2  | 4h   | 0          | 0.35732(6) | 0.5       | 0.085(2) | 0.70(2)         |
| Sn2  | 4h   | 0          | 0.35732(6) | 0.5       | 0.915(2) | 0.70(2)         |
| Ga3  | 8j   | 0.35190(6) | 0.36516(6) | 0.0089(2) | 1        | 0.47(2)         |
| Ga4  | 8j   | 0.14198(6) | 0.28126(6) | 0.9759(2) | 1        | 0.23(3)         |
| O1   | 4i   | 0.4296(4)  | 0          | 0.819(1)  | 1        | 0.33(4)         |
| O2   | 4i   | 0.9021(3)  | 0          | 0.421(1)  | 1        | 0.33(4)         |
| O3   | 8j   | 0.2405(3)  | 0.3643(3)  | 0.8980(8) | 1        | 0.33(4)         |
| O4   | 8j   | 0.4113(3)  | 0.2595(3)  | 0.8296(7) | 1        | 0.33(4)         |
| O5   | 8j   | 0.8584(2)  | 0.1438(3)  | 0.8513(7) | 1        | 0.33(4)         |
| O6   | 8j   | 0.0767(3)  | 0.3759(3)  | 0.1618(8) | 1        | 0.33(4)         |

$a = 15.37493(5) \text{ \AA}$ ,  $b = 11.89386(4) \text{ \AA}$ ,  $c = 5.24437(2) \text{ \AA}$ ,  $\beta = 90.6945(2)^\circ$ ,  $V = 958.954(6) \text{ \AA}^3$

$R_p = 3.518\%$ ,  $R_{\text{wp}} = 4.563\%$ ,  $R_{\text{exp}} = 2.253\%$ ,  $\text{GOF} = 2.025$ .

Table S6. Atomic coordinate, occupancy factor, isotropic thermal displacement factors for Ba<sub>3</sub>SnGa<sub>8</sub>In<sub>2</sub>O<sub>20</sub> obtained from Rietveld refinements

| atom | site | <i>x</i>   | <i>y</i>   | <i>z</i>  | Occ. | B <sub>eq</sub> |
|------|------|------------|------------|-----------|------|-----------------|
| Ba1  | 2a   | 0          | 0          | 0         | 1    | 1.63(5)         |
| Ba2  | 4i   | 0.27884(7) | 0          | 0.0127(2) | 1    | 1.09(3)         |
| Ga1  | 2b   | 0          | 0.5        | 0         | 0    | 1.19(5)         |
| Sn1  | 2b   | 0          | 0.5        | 0         | 1    | 1.19(5)         |
| Ga2  | 4h   | 0          | 0.35566(8) | 0.5       | 0    | 0.97(3)         |
| Sn2  | 4h   | 0          | 0.35566(8) | 0.5       | 1    | 0.97(3)         |
| Ga3  | 8j   | 0.35226(9) | 0.36605(9) | 0.0061(3) | 1    | 0.68(4)         |
| Ga4  | 8j   | 0.1434(1)  | 0.28000(9) | 0.9729(3) | 1    | 0.14(4)         |
| O1   | 4i   | 0.4375(6)  | 0          | 0.810(2)  | 1    | 0.56(7)         |
| O2   | 4i   | 0.8997(6)  | 0          | 0.414(2)  | 1    | 0.56(7)         |
| O3   | 8j   | 0.2395(4)  | 0.3724(5)  | 0.874(1)  | 1    | 0.56(7)         |
| O4   | 8j   | 0.4100(4)  | 0.2609(5)  | 0.814(1)  | 1    | 0.56(7)         |
| O5   | 8j   | 0.8569(4)  | 0.1456(5)  | 0.835(1)  | 1    | 0.56(7)         |
| O6   | 8j   | 0.0778(4)  | 0.3696(5)  | 0.166(1)  | 1    | 0.56(7)         |

$a = 15.41431(8) \text{ \AA}$ ,  $b = 11.93819(6) \text{ \AA}$ ,  $c = 5.27206(3) \text{ \AA}$ ,  $\beta = 90.5704(3) \text{ \AA}$ ,  $V = 970.112(9) \text{ \AA}^3$

$R_p = 5.302\%$ ,  $R_{wp} = 7.049\%$ ,  $R_{exp} = 2.250\%$ ,  $GOF = 3.134$ .

Table S7. Bond valences sum of  $\text{In}^{3+}$  and  $\text{Sn}^{4+}$  located at M1 or M2 site in  $\text{Ba}_3\text{SnGa}_{10-x}\text{In}_x\text{O}_{20}$

( $0 \leq x \leq 2.0$ )

| $x = 0$          |       |       |       |       |
|------------------|-------|-------|-------|-------|
|                  | In1   | In2   | Sn1   | Sn2   |
| Bond valence sum | /     | /     | 4.821 | 4.091 |
| $x = 0.5$        |       |       |       |       |
|                  | In1   | In2   | Sn1   | Sn2   |
| Bond valence sum | 5.060 | 3.645 | 5.102 | 3.674 |
| $x = 1.0$        |       |       |       |       |
|                  | In1   | In2   | Sn1   | Sn2   |
| Bond valence sum | 4.269 | 3.323 | 4.304 | 3.350 |
| $x = 1.5$        |       |       |       |       |
|                  | In1   | In2   | Sn1   | Sn2   |
| Bond valence sum | 4.094 | 2.924 | 4.127 | 2.948 |
| $x = 2.0$        |       |       |       |       |
|                  | In1   | In2   | Sn1   | Sn2   |
| Bond valence sum | 4.058 | 2.820 | 4.091 | 2.843 |



Table S8. Estimated band gap energy for  $\text{Ba}_3\text{SnGa}_{10-x}\text{In}_x\text{O}_{20}$

| $\text{Ba}_3\text{SnGa}_{10-x}\text{In}_x\text{O}_{20}$ | $E_g/\text{eV}$ |
|---------------------------------------------------------|-----------------|
| $x = 0$                                                 | 4.53            |
| $x = 0.5$                                               | 4.50            |
| $x = 1.0$                                               | 4.47            |
| $x = 1.5$                                               | 4.41            |
| $x = 2.0$                                               | 4.27            |

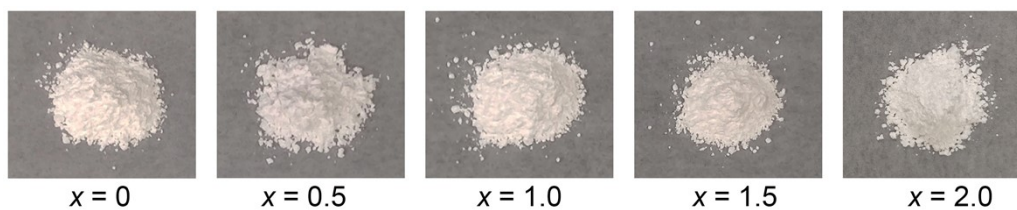

**Fig. S1.** Photographs of  $\text{Ba}_3\text{SnGa}_{10-x}\text{In}_x\text{O}_{20}$  ( $0 \leq x \leq 2.0$ ) samples.

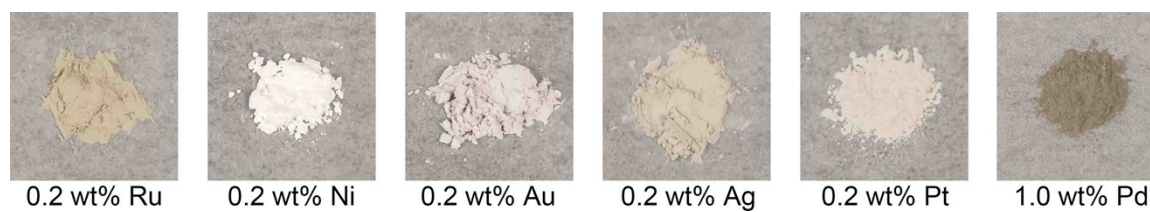

**Fig. S2.** Photographs for  $\text{Ba}_3\text{SnGa}_{8.5}\text{In}_{1.5}\text{O}_{20}$  loaded with different cocatalysts.

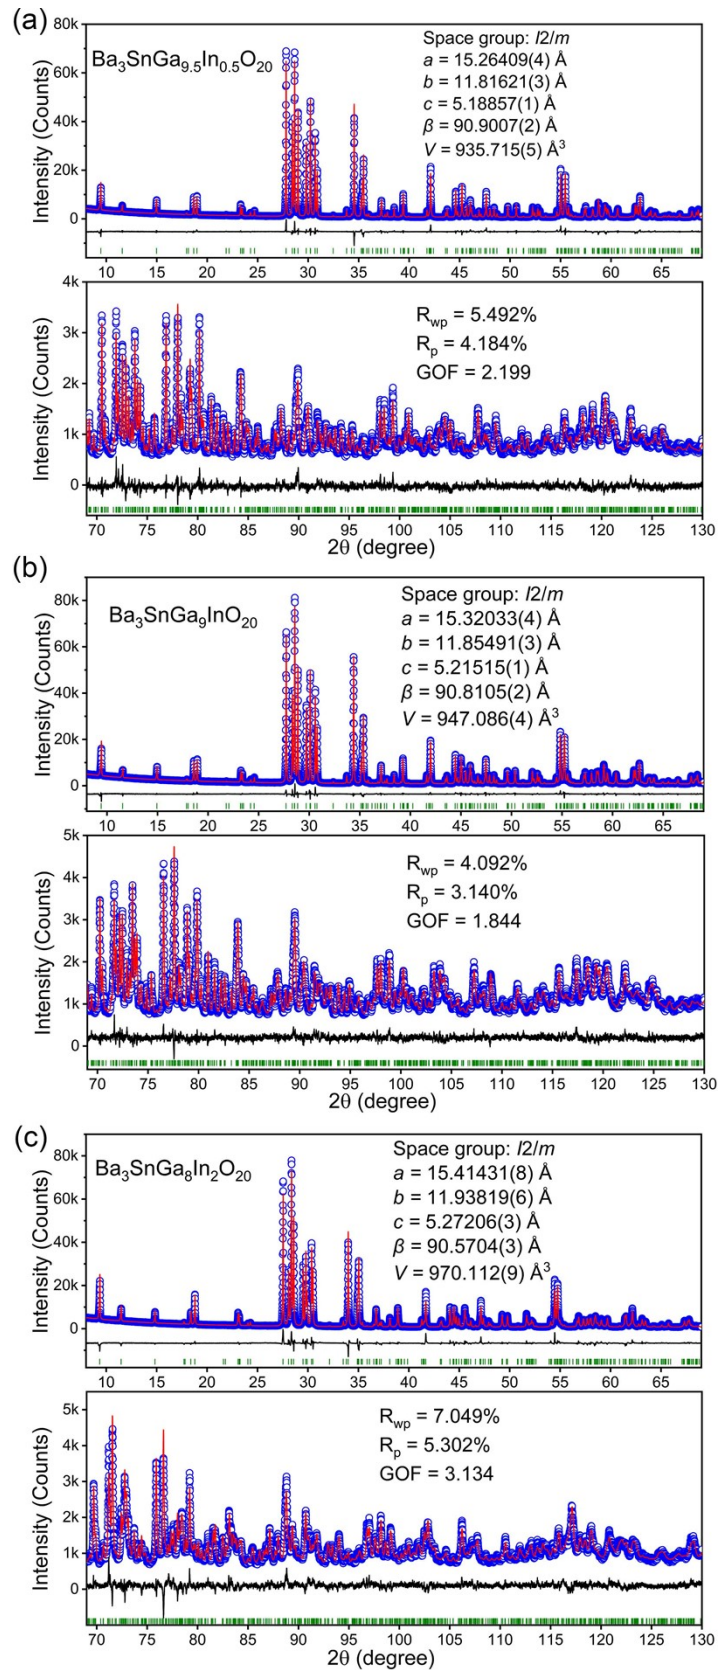

**Fig. S3.** Final convergence of the Rietveld refinements on high quality powder X-ray diffraction data for (a)  $\text{Ba}_3\text{SnGa}_{9.5}\text{In}_{0.5}\text{O}_{20}$ , (b)  $\text{Ba}_3\text{SnGa}_9\text{InO}_{20}$ , (c)  $\text{Ba}_3\text{SnGa}_8\text{In}_2\text{O}_{20}$ .

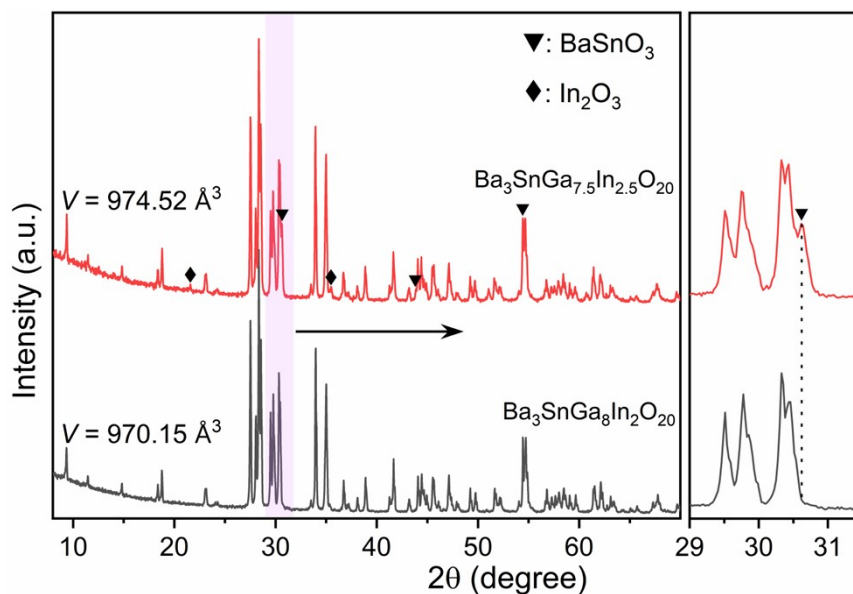

**Fig. S4.** Powder XRD patterns for phase-pure  $\text{Ba}_3\text{SnGa}_8\text{In}_2\text{O}_{20}$  (gray line) and impure  $\text{Ba}_3\text{SnGa}_{7.5}\text{In}_{2.5}\text{O}_{20}$  (red line). The impurity phases can be identified as  $\text{BaSnO}_3$  and  $\text{In}_2\text{O}_3$ .

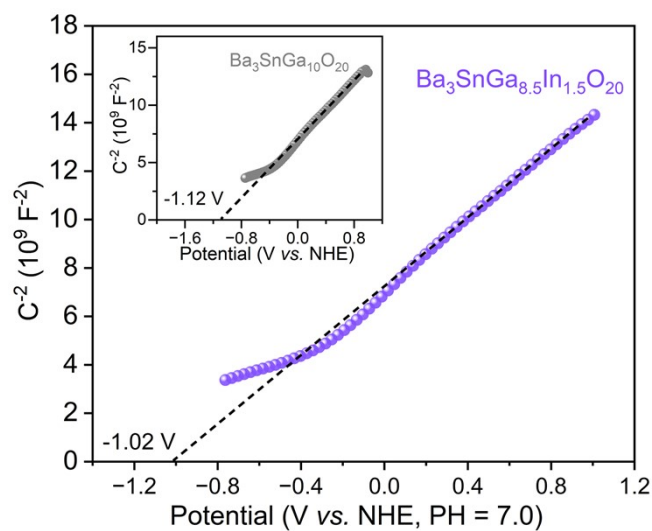

**Fig. S5.** Mott-Schottky plots for  $\text{Ba}_3\text{SnGa}_{10}\text{O}_{20}$  (the inset) and  $\text{Ba}_3\text{SnGa}_{8.5}\text{In}_{1.5}\text{O}_{20}$  in a 0.3 M  $\text{Na}_2\text{SO}_4$  aqueous solution (pH = 7.0).

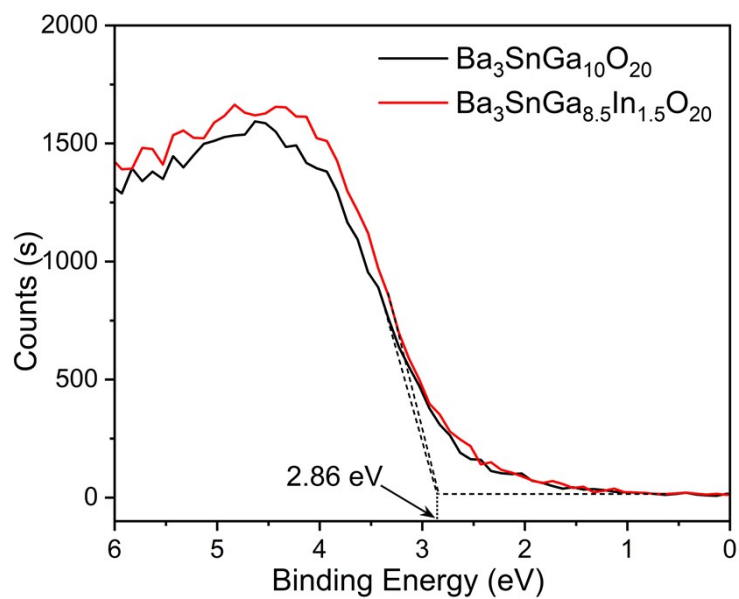

**Fig. S6.** Valence band-XPS curves for  $\text{Ba}_3\text{SnGa}_{10-x}\text{In}_x\text{O}_{20}$  ( $x = 0, 1.5$ ).

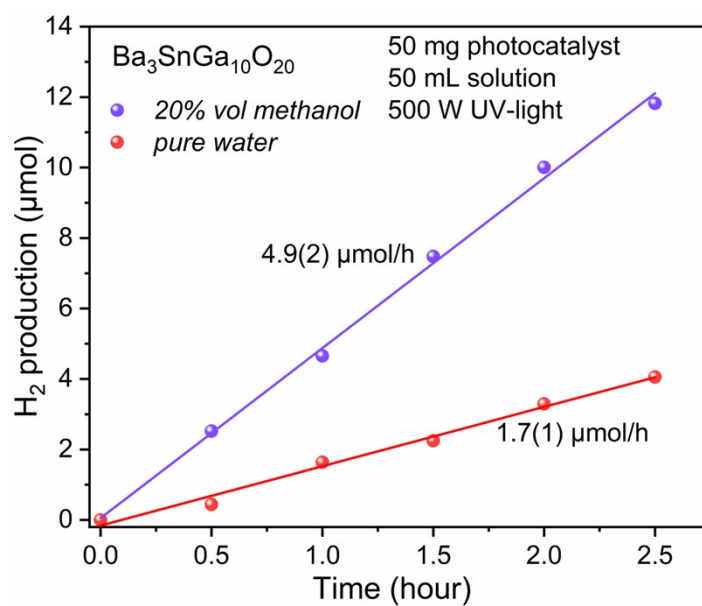

**Fig. S7.** Photocatalytic  $\text{H}_2$  generation of  $\text{Ba}_3\text{SnGa}_{10}\text{O}_{20}$  in 20 vol.% methanol aqueous solution (blue line) and in pure water (red line), respectively.

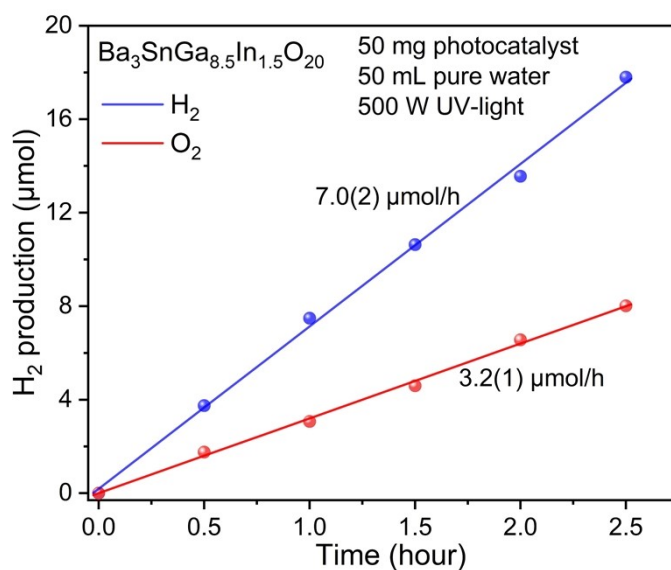

**Fig. S8.** Photocatalytic H<sub>2</sub> (blue line) and O<sub>2</sub> (red line) generation for Ba<sub>3</sub>SnGa<sub>8.5</sub>In<sub>1.5</sub>O<sub>20</sub> in pure water.

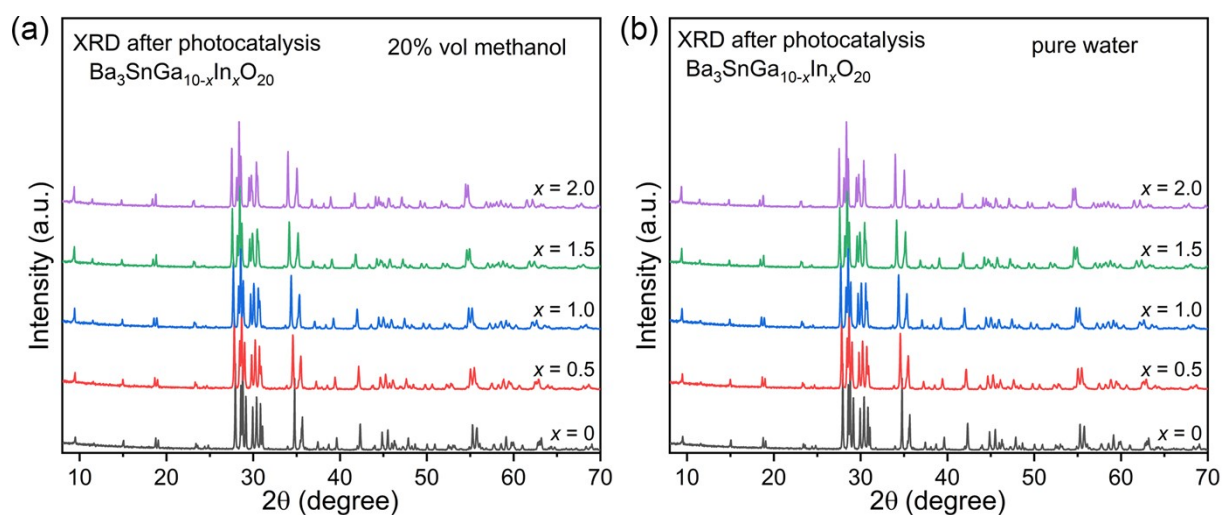

**Fig. S9.** Powder XRD patterns for Ba<sub>3</sub>SnGa<sub>10-x</sub>In<sub>x</sub>O<sub>20</sub> ( $0 \leq x \leq 2$ ) after photocatalytic reaction (a) in 20 vol.% methanol aqueous solution and (b) in pure water, respectively.

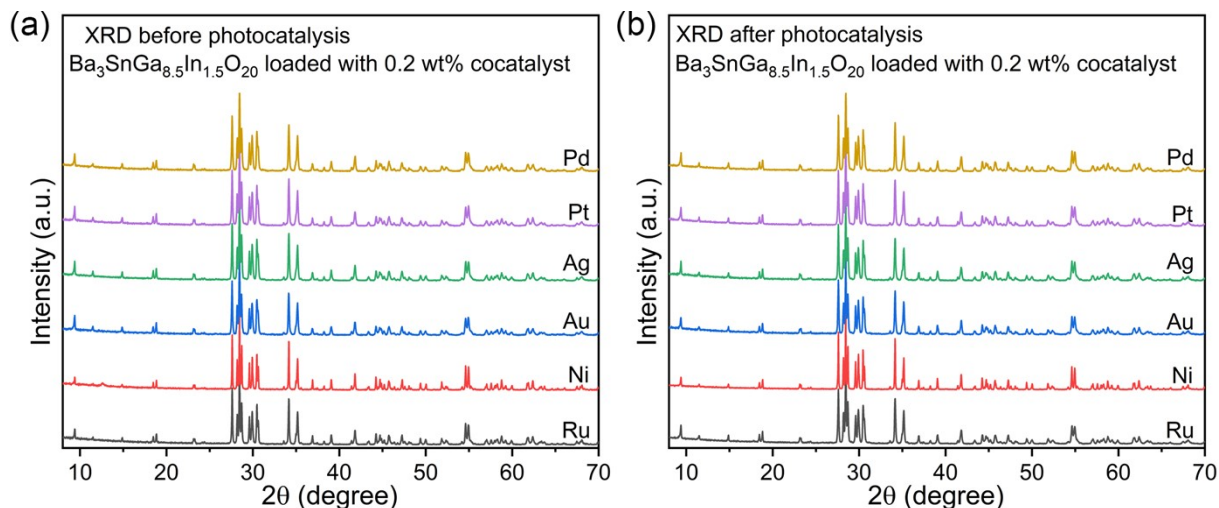

**Fig. S10.** Powder XRD patterns (a) before and (b) after photocatalytic reactions for  $\text{Ba}_3\text{SnGa}_{8.5}\text{In}_{1.5}\text{O}_{20}$  loaded with various cocatalysts.

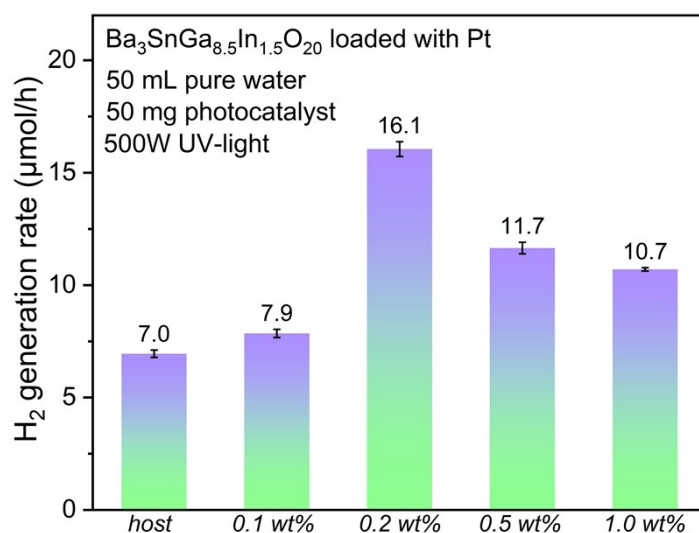

**Fig. S11.** Photocatalytic  $\text{H}_2$  generation rates for  $\text{Ba}_3\text{SnGa}_{8.5}\text{In}_{1.5}\text{O}_{20}$  loaded with different amounts of Pt.



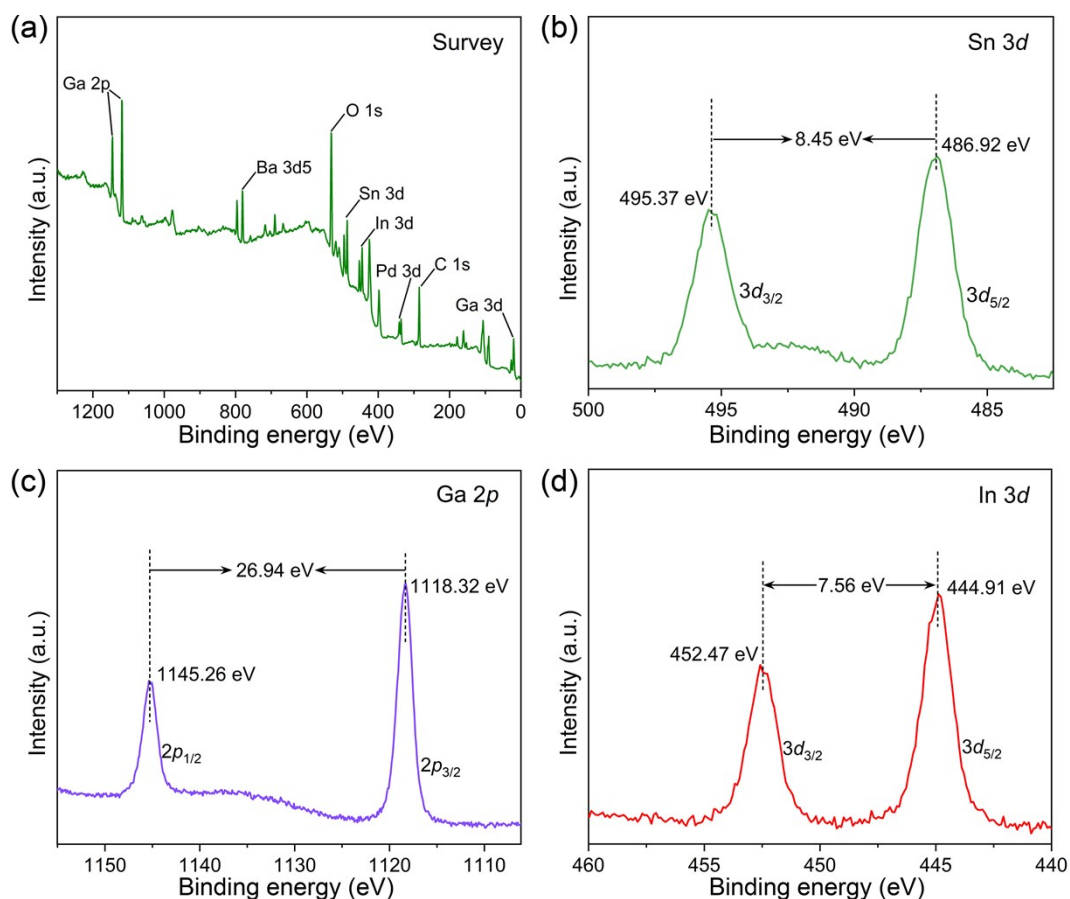

**Fig. S12.** (a) XPS survey scan of  $\text{Ba}_3\text{SnGa}_{8.5}\text{In}_{1.5}\text{O}_{20}$  loaded with 1 wt% Pd; (b) Sn 3d, (c) Ga 2p and (d) In 3d XPS spectra.

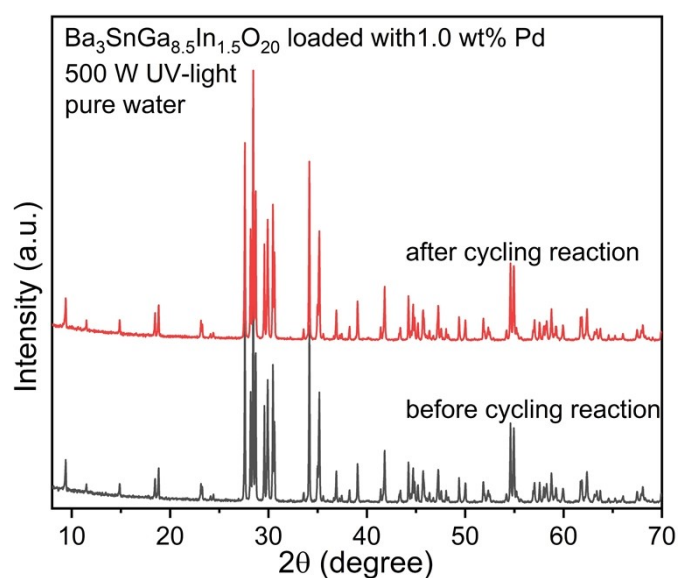

**Fig. S13.** Powder XRD patterns before (gray line) and after (red line) cyclic photocatalytic overall water splitting for  $\text{Ba}_3\text{SnGa}_{8.5}\text{In}_{1.5}\text{O}_{20}$  loaded with 1.0 wt% Pd.

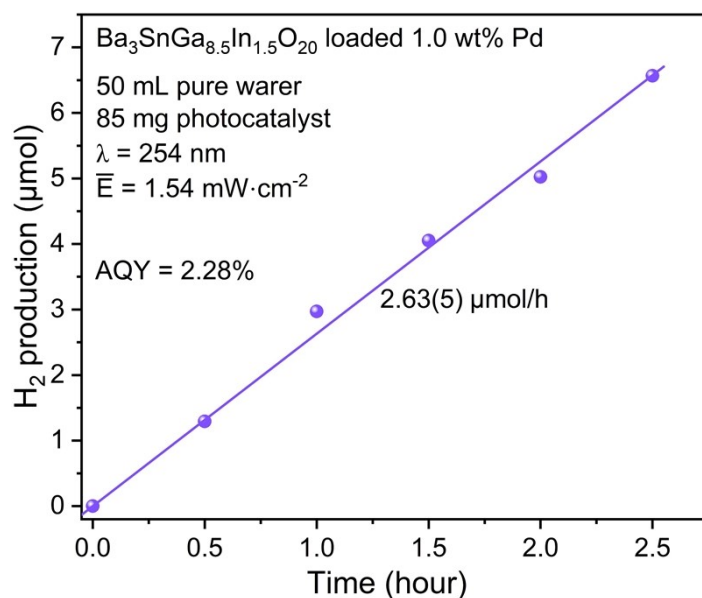

**Fig. S14.** Photocatalytic H<sub>2</sub> generation curve for Ba<sub>3</sub>SnGa<sub>8.5</sub>In<sub>1.5</sub>O<sub>20</sub> loaded with 1.0 wt% Pd. Photocatalytic condition: 85 mg of photocatalyst; 50 mL pure water; 500 W mercury lamp equipped with a 254 nm bandpass filter.

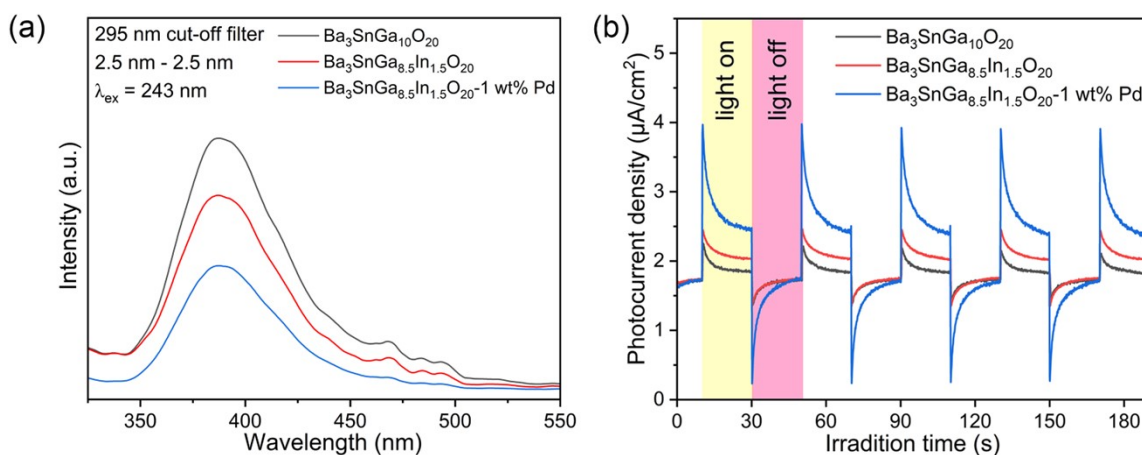

**Fig. S15.** (a) PL emission spectra and (b) transient photocurrent responses for Ba<sub>3</sub>SnGa<sub>10</sub>O<sub>20</sub> (gray lines), Ba<sub>3</sub>SnGa<sub>8.5</sub>In<sub>1.5</sub>O<sub>20</sub> (red lines), and Ba<sub>3</sub>SnGa<sub>8.5</sub>In<sub>1.5</sub>O<sub>20</sub> loaded with 1.0 wt% Pd (blue lines), respectively.
